# Supplementary material for: A sensitive two-photon probe to selectively detect monoamine oxidase B activity in Parkinson’s disease models
Source: Springer Nature journal article supplement (doi:10.1038/ncomms4276), 2014-02-13
Supplement: 41467_2014_BFncomms4276_MOESM21_ESM.mol [file 41467_2014_BFncomms4276_MOESM21_ESM.mol]

  ChemDraw01291406582D

 35 37  0  0  0  0  0  0  0  0999 V2000
   -0.7145   -0.8207    0.0000 N   0  0  0  0  0  0  0  0  0  0  0  0
   -0.7145   -1.6457    0.0000 C   0  0  0  0  0  0  0  0  0  0  0  0
    0.0000   -2.0582    0.0000 C   0  0  0  0  0  0  0  0  0  0  0  0
    0.7145   -1.6457    0.0000 C   0  0  0  0  0  0  0  0  0  0  0  0
    0.7145   -0.8207    0.0000 N   0  0  0  0  0  0  0  0  0  0  0  0
    0.0000   -0.4082    0.0000 C   0  0  0  0  0  0  0  0  0  0  0  0
    0.0000    0.4139    0.0000 C   0  0  0  0  0  0  0  0  0  0  0  0
   -1.4265   -2.0568    0.0000 C   0  0  0  0  0  0  0  0  0  0  0  0
    1.4265   -2.0568    0.0000 C   0  0  0  0  0  0  0  0  0  0  0  0
    2.1385   -1.6457    0.0000 C   0  0  0  0  0  0  0  0  0  0  0  0
    2.8504   -2.0568    0.0000 C   0  0  0  0  0  0  0  0  0  0  0  0
   -2.1385   -1.6457    0.0000 C   0  0  0  0  0  0  0  0  0  0  0  0
   -2.8504   -2.0568    0.0000 C   0  0  0  0  0  0  0  0  0  0  0  0
    2.8504   -2.8818    0.0000 C   0  0  0  0  0  0  0  0  0  0  0  0
    3.5649   -3.2943    0.0000 C   0  0  0  0  0  0  0  0  0  0  0  0
    4.2794   -2.8818    0.0000 C   0  0  0  0  0  0  0  0  0  0  0  0
    4.2794   -2.0568    0.0000 C   0  0  0  0  0  0  0  0  0  0  0  0
    3.5649   -1.6443    0.0000 C   0  0  0  0  0  0  0  0  0  0  0  0
   -3.5649   -1.6443    0.0000 C   0  0  0  0  0  0  0  0  0  0  0  0
   -4.2794   -2.0568    0.0000 C   0  0  0  0  0  0  0  0  0  0  0  0
   -4.2794   -2.8818    0.0000 C   0  0  0  0  0  0  0  0  0  0  0  0
   -3.5649   -3.2943    0.0000 C   0  0  0  0  0  0  0  0  0  0  0  0
   -2.8504   -2.8818    0.0000 C   0  0  0  0  0  0  0  0  0  0  0  0
    4.9914   -3.2928    0.0000 N   0  0  0  0  0  0  0  0  0  0  0  0
   -4.9914   -3.2928    0.0000 N   0  0  0  0  0  0  0  0  0  0  0  0
   -5.7034   -2.8818    0.0000 C   0  0  0  0  0  0  0  0  0  0  0  0
    5.7034   -2.8818    0.0000 C   0  0  0  0  0  0  0  0  0  0  0  0
    0.0000    1.2389    0.0000 C   0  0  0  0  0  0  0  0  0  0  0  0
    0.0000    2.0611    0.0000 C   0  0  0  0  0  0  0  0  0  0  0  0
    0.7120    2.4721    0.0000 C   0  0  0  0  0  0  0  0  0  0  0  0
    1.4240    2.0611    0.0000 C   0  0  0  0  0  0  0  0  0  0  0  0
    2.1360    2.4721    0.0000 C   0  0  0  0  0  0  0  0  0  0  0  0
    2.8480    2.0611    0.0000 O   0  0  0  0  0  0  0  0  0  0  0  0
    2.1360    3.2943    0.0000 O   0  0  0  0  0  0  0  0  0  0  0  0
    3.5600    2.4721    0.0000 C   0  0  0  0  0  0  0  0  0  0  0  0
  1  2  2  0      
  2  3  1  0      
  3  4  2  0      
  4  5  1  0      
  5  6  2  0      
  6  1  1  0      
  6  7  1  0      
  2  8  1  0      
  4  9  1  0      
  9 10  2  0      
 10 11  1  0      
  8 12  2  0      
 12 13  1  0      
 11 14  2  0      
 14 15  1  0      
 15 16  2  0      
 16 17  1  0      
 17 18  2  0      
 18 11  1  0      
 13 19  2  0      
 19 20  1  0      
 20 21  2  0      
 21 22  1  0      
 22 23  2  0      
 23 13  1  0      
 16 24  1  0      
 21 25  1  0      
 25 26  1  0      
 24 27  1  0      
  7 28  3  0      
 28 29  1  0      
 29 30  1  0      
 30 31  1  0      
 31 32  1  0      
 32 33  1  0      
 32 34  2  0      
 33 35  1  0      
M  END
