# Supplementary material for: A sensitive two-photon probe to selectively detect monoamine oxidase B activity in Parkinson’s disease models
Source: Springer Nature journal article supplement (doi:10.1038/ncomms4276), 2014-02-13
Supplement: 41467_2014_BFncomms4276_MOESM25_ESM.mol [file 41467_2014_BFncomms4276_MOESM25_ESM.mol]

  ChemDraw01291406582D

 23 24  0  0  0  0  0  0  0  0999 V2000
    2.1722    0.4135    0.0000 C   0  0  0  0  0  0  0  0  0  0  0  0
    1.4571    0.8307    0.0000 C   0  0  0  0  0  0  0  0  0  0  0  0
    0.7383    0.4135    0.0000 C   0  0  0  0  0  0  0  0  0  0  0  0
    0.7383   -0.4143    0.0000 C   0  0  0  0  0  0  0  0  0  0  0  0
    1.4571   -0.8316    0.0000 C   0  0  0  0  0  0  0  0  0  0  0  0
    2.1722   -0.4143    0.0000 C   0  0  0  0  0  0  0  0  0  0  0  0
    0.0233   -0.8260    0.0000 N   0  0  0  0  0  0  0  0  0  0  0  0
   -0.6907   -0.4127    0.0000 C   0  0  0  0  0  0  0  0  0  0  0  0
    0.0224   -1.6510    0.0000 C   0  0  0  0  0  0  0  0  0  0  0  0
   -1.4056   -0.8244    0.0000 O   0  0  0  0  0  0  0  0  0  0  0  0
   -0.6897    0.4123    0.0000 O   0  0  0  0  0  0  0  0  0  0  0  0
   -2.1196   -0.4111    0.0000 C   0  0  0  0  0  0  0  0  0  0  0  0
   -2.8346   -0.8228    0.0000 C   0  0  0  0  0  0  0  0  0  0  0  0
   -3.5486   -0.4094    0.0000 C   0  0  0  0  0  0  0  0  0  0  0  0
   -4.2635   -0.8211    0.0000 N   0  0  0  0  0  0  0  0  0  0  0  0
    2.8891   -0.8283    0.0000 C   0  0  0  0  0  0  0  0  0  0  0  0
    3.6061   -0.4143    0.0000 C   0  0  0  0  0  0  0  0  0  0  0  0
    3.6061    0.4135    0.0000 C   0  0  0  0  0  0  0  0  0  0  0  0
    2.8891    0.8275    0.0000 C   0  0  0  0  0  0  0  0  0  0  0  0
    4.3205    0.8260    0.0000 C   0  0  0  0  0  0  0  0  0  0  0  0
    4.9775    0.4135    0.0000 C   0  0  0  0  0  0  0  0  0  0  0  0
    4.3205    1.6510    0.0000 O   0  0  0  0  0  0  0  0  0  0  0  0
   -4.9775   -0.4078    0.0000 C   0  0  0  0  0  0  0  0  0  0  0  0
  1  2  2  0      
  2  3  1  0      
  3  4  2  0      
  4  5  1  0      
  5  6  2  0      
  6  1  1  0      
  4  7  1  0      
  7  8  1  0      
  7  9  1  0      
  8 10  1  0      
  8 11  2  0      
 10 12  1  0      
 12 13  1  0      
 13 14  1  0      
 14 15  1  0      
  6 16  1  0      
 16 17  2  0      
 17 18  1  0      
 18 19  2  0      
 19  1  1  0      
 18 20  1  0      
 20 21  1  0      
 20 22  2  0      
 15 23  1  0      
M  END
